1 **The Effects of Vancomycin on the Viability and Osteogenic Potential of Bone-**  
2 **derived Mesenchymal Stem Cells**

3

4 **Elzaan Booysen<sup>a</sup>, Hanél Sadie-Van Gijsen<sup>b,\*</sup>, Shelly M. Deane<sup>a</sup>, William Ferris<sup>b</sup>, Leon M.T.**  
5 **Dicks<sup>a#</sup>**

6

7 <sup>a</sup>Department of Microbiology, Faculty of Natural Sciences, Stellenbosch University,  
8 Stellenbosch, South Africa

9 <sup>b</sup>Division of Endocrinology, Department of Medicine, Faculty of Medicine and Health Sciences,  
10 Stellenbosch University Tygerberg Campus, Parow, South Africa

11

12 Running Head: Effect of vancomycin on mesenchymal stem cells

13

14 #Address correspondence to: LMTD@sun.ac.za

15 \*Present address: Division of Medical Physiology, Department of Medicine, Faculty of Medicine  
16 and Health Sciences, Stellenbosch University Tygerberg Campus, Parow, South Africa

17

18

19 **ABSTRACT** Periprosthetic joint infections (PJI), caused by methicillin-resistant *Staphylococcus*  
20 *aureus* (MRSA), is the major cause of total hip arthroplasty (THA) failures. Traditionally,  
21 MRSA is treated with vancomycin, administered intravenously or applied directly onto infected  
22 tissue. The effect of direct (as opposed to systemic) vancomycin treatment on bone formation  
23 and remodelling is largely unknown. The minimal inhibitory concentration (MIC) of  
24 vancomycin was determined by adding 200  $\mu$ l of different concentrations (1 – 20  $\mu$ g/ml) to  
25 actively growing cultures of *S. aureus* Xen 31 (methicillin-resistant) and *S. aureus* Xen 36  
26 (methicillin-sensitive), respectively, and recording changes in optical density over 24 h. Bone  
27 marrow-derived and proximal femur-derived mesenchymal stem cells (bmMSCs and pfMSCs)  
28 from rat femora were exposed to 1 x MIC (5  $\mu$ g/ml) and 4 x MIC (20  $\mu$ g/ml) of vancomycin for  
29 7 days. Cell viability was determined by staining with crystal violet and MTT (3-(4,5-  
30 dimethylthiazol-2-yl)-2,5-diphenyltetrazolium bromide), respectively, and osteogenic  
31 differentiation by staining with Alizarin Red S. Vancomycin had no effect on the viability of  
32 bmMSCs and pfMSCs, even at high levels (20  $\mu$ g/ml). The osteogenic differentiation of  
33 pfMSCs was partially inhibited, while osteogenesis in bmMSCs was not severely affected. The  
34 direct application of vancomycin to infected bone tissue, even at excessive levels, may preserve  
35 the viability of resident MSC populations. Short-term demineralization may thus be reversed  
36 after cessation of vancomycin treatment, improving the outcome of THA surgery.

37

38 **KEYWORDS** Vancomycin; mesenchymal stem cells; viability

39

40

41

## 42 INTRODUCTION

43 The three major load bearing joints in the human body are the ankle, knee and hip (1). The  
44 human hip joint has a complex anatomical structure and is responsible for carrying the weight of  
45 the upper body. During daily activity, the hip joint may experience loading forces up to 7 times  
46 the body weight of the individual, generating immense mechanical pressure which is most likely  
47 the main cause for osteoarthritis (OA) in this joint (2). OA affects more than 25% of elderly  
48 people and is therefore a major cause of disability in this population group (3, 4).

49 Currently the only treatment available for severe hip OA is total hip arthroplasty (THA) (5).  
50 A metal prosthesis is inserted into the proximal region of the femur, replacing the proximal  
51 femur head and neck (6). Although THA is considered the most successful orthopaedic  
52 procedure of the past 120 years, and although advances in the field have significantly improved  
53 the risk profile associated with this procedure over the past five decades, complications still do  
54 occur (7–9). Periprosthetic joint infection (PJI) is the main cause for THA revision surgeries and  
55 is defined as bacterial contamination of the joint prosthesis and infection of the adjacent tissue  
56 (10). Most, if not all, PJI are caused by bacteria capable of forming biofilms (5). Many strains  
57 of these bacteria are resistant to a number of antibiotics (11), and treating PJI is therefore  
58 extremely difficult. The most common bacterial infections after THA are Gram-positive cocci.  
59 *Staphylococcus aureus* was isolated in 38% of PJI cases. Fifty-three percent of the strains were  
60 resistant to methicillin (12).

61 Failed treatment of PJI with conventional antibiotic regimes places an immense burden on  
62 medical professionals. Conventional treatments include intravenous administration of antibiotics  
63 for a maximum of 2 weeks, while aggressive treatment includes removal of the infected  
64 prosthesis and flushing of the infected joint (one-step revision surgery), followed by another 12  
65 weeks on antibiotics. Once the infection has been cleared, a new prosthesis is inserted (13). In

66 severe cases a surgeon can opt for a two-step revision surgery. This entails initial removal of the  
67 infected prosthesis and insertion of an antibiotic-augmented cement spacer, followed by the  
68 implantation of a new prosthesis once the bacterial infection has been eradicated (13, 14). Both  
69 one-step and two-step revision surgeries can result in prolonged immobility, hospitalization and  
70 morbidity. The cost of treatment of a single episode of PJI can escalate to USD 50,000 or more  
71 (9). The increase in antibiotic resistance among hospital-acquired infections like PJI has also  
72 increased the risk of failing to successfully treat PJI (15, 16). It is therefore clear that PJI presents  
73 a major challenge from both a health-care and economic perspective (17).

74 Methicillin-resistant *Staphylococcus* infections are usually treated with vancomycin (18).  
75 Vancomycin is either administered intravenously or directly to the infected site, by means of  
76 antibiotic-loaded cement spacers (19–21). However, the effect of direct (as opposed to systemic)  
77 vancomycin treatment on bone formation and remodelling is largely unknown. Bone marrow-  
78 derived mesenchymal stem cells (bmMSCs) have traditionally been used to study the effects of  
79 pharmaceutical treatments on the viability, differentiation and function of osteoblasts (bone-  
80 forming cells) *in vitro* (22–24). Recently Jacobs and co-authors (25) reported on a newly  
81 characterized MSC, isolated from the proximal end of rat femora. Although these proximal  
82 femur MSCs (pfMSCs) are phenotypically similar to bmMSCs, they are functionally distinct,  
83 with increased glucocorticoid sensitivity and a reduced osteoblastic differentiation potential in  
84 culture. *In vivo*, pfMSCs reside in the exact area of bone tissue that is in contact with the THA  
85 prosthesis, and is therefore likely to participate in osseointegration of the prosthesis.  
86 Consequently, these cells can serve as a relevant *in vitro* model to assess the effects of directly  
87 applied vancomycin on the MSC populations residing in the bone tissue, which could affect the  
88 success of THA revision surgeries. In the present study we evaluate the effects on increasing

89 doses of vancomycin in the viability and osteoblastic differentiation of cultured rat bmMSCs and  
90 pfMSCs.

91

## 92 **MATERIALS AND METHODS**

93 **Materials.** Bacterial growth medium was from Biolab Diagnostics (Midrand, South Africa),  
94 unless stated otherwise. All constituents of osteogenic differentiation media were from Sigma-  
95 Aldrich (Schndlldorf, Germany). Dulbecco's Modified Eagle Medium (DMEM: #BE12-604F;  
96 4.5 g/L glucose), Penicillin/Streptomycin (Pen-Strep: #DE17-602E; 10000 units each in 100 ml),  
97 trypsin (#BE17-161E) and Hanks' Balanced Salt Solution with calcium and magnesium (HBSS:  
98 #BE10-508F) were from Lonza (Basel, Switzerland). Fetal bovine serum (FBS) was from  
99 Biochrom (Berlin, Germany) and collagenase I (#CLS1) from Worthington Biochemical  
100 Corporation (Lakewood, USA). Cell culture dishes were from NEST Biotechnology (New  
101 Jersey, USA). Sodium pentobarbitone (Eutha-naze) was from Bayer (Kempton Park, Gauteng,  
102 South Africa).

103 **Determination of MIC (minimum inhibitory concentration).** A micro-broth dilution  
104 assay, described by Andrews (26), was used to determine the MIC of vancomycin.  
105 *Staphylococcus aureus* Xen 31 (methicillin-resistant *S. aureus*: MRSA) and *S. aureus* Xen 36  
106 (methicillin-sensitive) were used as indicator strains. Both strains were from Bioware™  
107 Microorganisms (Caliper Life Sciences, Hopkinton, USA). Cells from an overnight culture in  
108 Brain Heart infusion (BHI) broth, cultured at 37°C, were streaked onto BHI agar and incubated  
109 for 24 h at 37°C. A single colony was inoculated into BHI broth and incubated for 18 h at 37°C.  
110 Overnight cultures of the two strains were each adjusted to an OD of 0.1 (600 nm). Different  
111 concentrations of vancomycin (1 – 20 µg/ml) were added to each liquid culture (final volume of

112 200  $\mu$ l) and changes in growth observed by recording absorbance readings at 600 nm,  
113 immediately after addition, and 6 h and 24 h later.

114 **Isolation and maintenance of MSC.** Ethical clearance to conduct experiments involving  
115 animals was granted by the Research Ethics Committee: Animal Care and Use of Stellenbosch  
116 University (reference number SU-ACUD15-00012). Male Wistar rats, 12 weeks old, with an  
117 average body mass of 250 g, were housed at the Stellenbosch University Animal Facility and  
118 kept according to the guidelines of the South African Medical Research Council. The animals  
119 were fed *ad libitum* on standard laboratory feed and sacrificed with an intraperitoneal injection of  
120 sodium pentobarbitone (12 mg/kg body mass).

121 Isolation of bmMSCs and pfMSCs was performed as described by Jacobs and co-workers  
122 (25). Femora were surgically removed and cleaned from muscle tissue using sterile gauze.  
123 Proximal regions of the femora were removed with sterile surgical side cutters, cut into 1 mm<sup>3</sup>  
124 fragments and digested in Hanks' Balanced Salt Solution containing 0.075% (w/v) collagenase I  
125 and 1.5% (w/v) bovine serum albumin for 1 h at 37°C. Denuded bone fragments were washed  
126 five times with DMEM, seeded into a culture dish with isolation media (DMEM containing 1%,  
127 v/v, Pen-Strep, and 20%, v/v, FBS) and incubated at 37°C for 24h. Bone fragments were then  
128 washed with sterile phosphate-buffered saline (PBS), retained in the dish and submerged in  
129 standard growth media (SGM: DMEM containing 1%, v/v, Pen-Strep and 10%, v/v, FBS) for 7  
130 to 10 days to allow migration of pfMSC from the fragments. bmMSCs were flushed from bone  
131 marrow cavities with 9 ml (3 ml per flush) cell isolation media and collected in a cell culture dish  
132 (100 mm diameter). pfMSCs and bmMSCs were cultured at 37°C for 24 h in 95% humidified air  
133 and in the presence of 5% CO<sub>2</sub>. Sterile PBS at 37°C was used to remove non-adherent tissue and  
134 the media replaced with SGM.

135 Both cell types (pfMSCs and bmMSCs) were cultured to 80% confluence and then  
136 disaggregated with 1 ml 0.5% (w/v) trypsin and sub-cultured at a ratio of 1:4. All cell cultures  
137 were expanded to passage 3 before being used for further experiments. Cell growth media,  
138 including media containing supplements, were replaced every 2-3 days. Cells were maintained  
139 at 37°C in 95% humidified air containing 5% CO<sub>2</sub>.

140 **Cytotoxicity of vancomycin.** Isolated MSCs at passage 3 were seeded into 12-well plates  
141 for crystal violet staining or 96-well plates for the MTT conversion assay and grown until post-  
142 confluence in SGM. A combination of cycloheximide (10 µg/ml) and tumour necrosis factor- $\alpha$   
143 (TNF- $\alpha$ ; 5 ng/ml) was used as the positive control for cytotoxicity in bmMSCs, while 1 µM  
144 dexamethasone (Dex) was used as the positive control for cytotoxicity in pfMSCs, as reported  
145 previously (25). Before crystal violet staining, cells were treated with 1 x MIC and 4 x MIC  
146 vancomycin, respectively, in SGM for 7 days, fixed with 70% (v/v) ethanol, stained for 5 min  
147 with 500 µl 0.01% (w/v) crystal violet solution and rinsed three times with PBS. In these  
148 experiments MIC levels were calculated based on results obtained with MRSA strain Xen 31.  
149 Bound crystal violet was extracted with 500 µl 75% (v/v) ethanol and absorbance measured at  
150 570 nm. For the MTT conversion assays, cells were treated as described for crystal violet  
151 staining, with a final volume of PBS being 100 µl per well. The methodology for the assay was  
152 adapted from the protocol for the Sigma-Aldrich *in vitro* Toxicology Assay Kit (MTT-based,  
153 #Tox1). After 7 days of treatment with 1 x MIC and 4 x MIC vancomycin, respectively, 10 µl of  
154 5 mg/ml MTT stock solution (Sigma-Aldrich #M2128), dissolved in DMEM, was added to each  
155 well. Plates were incubated for 2h at 37°C in the dark and the colour reaction stopped by adding  
156 100 µl of solubilisation solution (10% Triton X-100 diluted with 0.1 N HCL in anhydrous  
157 isopropanol) to each well. Solubilisation was aided by incubating the 96-well plate on a plate  
158 shaker and repeated mixing with a pipette. Colour development was quantified

159 spectrophotometrically at 690 nm (background absorbance) and 570 nm, respectively.  
160 Background absorbance values were subtracted from the  $A_{570}$  values. All experiments were  
161 performed with quadruplicate biological repeats and triplicate technical repeats.

162 **MSC differentiation.** Isolated MSCs at passage 3 were plated in 12-well culture plates and  
163 cultures in SGM until post-confluence as described elsewhere. Osteoblastic differentiation was  
164 induced with osteogenic media (OM: SGM supplemented with 50  $\mu$ M ascorbic acid, 10 mM  $\beta$ -  
165 glycerolphosphate and 10 nM dexamethasone), as described by Jacobs *et al.* (25). In parallel,  
166 cells were differentiated in the presence of increasing concentrations of vancomycin.  
167 Differentiation was evaluated by staining with Alizarin Red S stain (ARS: Amresco, USA) after  
168 7 days (bmMSC) or 21 days (pfMSC). Before staining with 40mM ARS (pH 4.0 – 4.1), cells  
169 were washed with PBS, fixed for 5 min at 25°C with 70% (v/v) ethanol and rinsed twice with  
170 sterile water. BmMSCs were stained for 2 to 4 hours, after which the excess stain was removed,  
171 and cells washed three times with sterile water, once with sterile PBS and an additional three  
172 times with sterile water. Bound stain was extracted using 10% (w/v) cetylpyridinium chloride  
173 (CPC) dissolved in 10 mM  $\text{Na}_2\text{HPO}_4$  (pH 7.0) and quantified spectrophotometrically at 562 nm.  
174 PfMSCs were stained overnight with ARS and washed, as described for bmMSC. Since pfMSCs  
175 have reduced osteogenic potential, staining was quantified using image analysis. Images were  
176 captured using an Olympus CKX41 microscope (CKX41, CchN 10x0.25 PhP objective), fitted  
177 with a Canon EOS 600D camera at 10x magnification. Four random images (one in each  
178 quadrant) were taken of each well, resulting in 12 images per treatment since experiments were  
179 performed in triplicate. Images were analysed with ImageJ software (version 1.51 J8) and  
180 converted into red-green-blue stacks. Analyses were performed in the green channel. A  
181 threshold value of T=90 was used to exclude non-specific background staining and remained



182 unchanged throughout. The percentage area stained was recorded and the average for the 12  
183 images per condition was calculated.

184 **Statistical analysis.** GraphPad Prism (version 5.01) was used for all statistical analyses and  
185 data were expressed as average  $\pm$ SD. One-way ANOVA and Dunnett's *post hoc* test were used  
186 to analyse the data. When  $P < 0.05$ , the difference was considered to be statistically significant  
187 and indicated with an \*.

188

## 189 **RESULTS AND DISCUSSION**

190 The increase in antibiotic resistance among hospital-acquired infections such as PJI has  
191 escalated the risk of PJI treatment failure (15, 16) and may force clinicians to employ ever more  
192 aggressive treatment strategies with currently available antibiotics. In the case of PJI, these  
193 strategies often involve direct application of antibiotics such as vancomycin to the infected  
194 surgical site (13, 14), but the effects of such treatment on the surrounding bone tissue have not  
195 been studied at a cellular level. In particular, detrimental effects of antibiotic treatment on the  
196 stem cell population residing in bone may result in poor osseointegration of implanted  
197 prostheses, leading to structural failure and impaired function of the reconstructed joint even  
198 when the PJI has been successfully eradicated.

199 Based on micro-broth dilution assays, the MIC of vancomycin against *S. aureus* Xen 31  
200 (MRSA) was 5  $\mu$ g/ml and 1  $\mu$ g/ml against Xen 36, suggesting that *S. aureus* Xen 31 has reduced  
201 susceptibility for vancomycin (27, 28).

202 Crystal violet stained all cells (dead and alive), while the MTT conversion assay detected  
203 only metabolically active cells. High doses of vancomycin, up to 20  $\mu$ g/ml (4 x MIC for MRSA),  
204 had no cytotoxic effects on bmMSCs (Fig. 1A and Fig. 2A) and pfMSC (Fig. 1B and Fig. 2B), as  
205 shown with both assays.

206 Based on ARS staining, bmMSCs were fully differentiated after 7 days of treatment with  
207 OM, while pfMSCs formed individual mineralized nodules after 21 days of OM treatment.  
208 Mineralization in bmMSCs increased slightly, but not significantly, when treated with 4 x MIC  
209 vancomycin (Fig. 3A). In contrast, pfMSCs treated with vancomycin showed significantly  
210 reduced mineralization, compared to OM-treated cells (Fig. 3B).

211 Vancomycin inhibitions bacterial cell wall synthesis by binding to the terminal D-Ala-D-Ala  
212 dipeptide of peptidoglycan units (29). This may explain why vancomycin had no cytotoxic effect  
213 on MSCs. However, the mechanisms involved in the reduction of mineralization, specifically in  
214 pfMSCs, but not in bmMSCs, remains unclear. The two cell types react differently to external  
215 factors, as also shown with exposure to glucocorticoids (25). In the latter study, the authors have  
216 shown that pfMSCs are more sensitive to glucocorticoids than bmMSCs.

217 Our findings are of particular relevance for THA, as pfMSCs reside in the area directly  
218 involved in THA (6). Our results suggest that direct administration of vancomycin to an infected  
219 hip joint may not have a detrimental effect on the viability of the MSC population residing in the  
220 affected bone tissue and may, therefore, spare the surrounding bone tissue, or at least preserve  
221 the capacity for tissue regeneration. The mild anti-osteogenic effects of vancomycin in  
222 differentiating pfMSCs may cause local short-term loss of bone mineral density at vancomycin-  
223 treated sites. However, we hypothesize that the absence of cytotoxicity of vancomycin on  
224 undifferentiated pfMSCs may result in the population of pfMSCs surrounding the affected area  
225 remaining intact, which will contribute to repair of the bone tissue and successful  
226 osseointegration of the prosthesis upon cessation of vancomycin treatment.

227

228 **ACKNOWLEDGMENTS**

229 The research was funded by the National Research Foundation, South Africa. Grants were  
230 allocated to H Sadie-Van Gijsen and LMT Dicks. The funders had no role in study design, data  
231 collection and interpretation, or the decision to submit the work for publication.

232

## 233 **REFERENCES**

- 234 1. Kujala UM, Kaprio J, Sarna S. 1994. Osteoarthritis of weight bearing joints of lower limbs  
235 in former elite male athletes. *Br Med J* 308:231–234.
- 236 2. Crowninshield RD, Johnston RC, Andrews JG, Brand RA. 1978. A biomechanical  
237 investigation of the human hip. *J Biomech* 11:75–85.
- 238 3. Sato T, Sato N. 2015. Clinical relevance of the hip joint: Part I - Review of the anatomy of  
239 the hip joint. *Int Musculoskelet Med* 37:141–145.
- 240 4. Zhang Y, Jordan JM. 2010. Epidemiology of Osteoarthritis. *Clin Geriatr Med* 26:355–369.
- 241 5. Song Z, Borgwardt L, Høiby N, Wu H, Sørensen TS, Borgwardt A. 2013. Prosthesis  
242 infections after orthopedic joint replacement: the possible role of bacterial biofilms.  
243 *Orthop Rev (Pavia)* 5:65–71.
- 244 6. Siopack JS, Jergesen HE. 1995. Total hip arthroplasty. *West J Med* 162:243–249.
- 245 7. Knight SR, Aujla R, Biswas SP. 2011. Total Hip Arthroplasty - over 100 years of  
246 operative history. *Orthop Rev (Pavia)* 3:72–74.
- 247 8. Pivec R, Johnson AJ, Mears SC, Mont MA. 2012. Hip arthroplasty. *Lancet* 380:1768–  
248 1777.
- 249 9. Lentino JR. 2003. Prosthetic joint infections: bane of orthopedists, challenge for infectious

- 250 disease specialists. *Clin Infect Dis* 36:1157–1161.
- 251 10. Tande AJ, Patel R. 2014. Prosthetic joint infection. *Clin Microbiol Rev* 27:302–345.
- 252 11. Høiby N, Bjarnsholt T, Givskov M, Molin S, Ciofu O. 2010. Antibiotic resistance of  
253 bacterial biofilms. *Int J Antimicrob Agents* 35:322–332.
- 254 12. Pulido L, Ghanem E, Joshi A, Purtill JJ, Parvizi J. 2008. Periprosthetic Joint Infection: the  
255 incidence, timing, and predisposing factors. *Clin Orthop Relat Res* 466:1710–1715.
- 256 13. Parvizi J, Aggarwal V, Rasouli M. 2013. Periprosthetic joint infection: Current concept.  
257 *Indian J Orthop* 47:10–17.
- 258 14. Wolf M, Clar H, Friesenbichler J, Schwantzer G, Bernhardt G, Gruber G, Glehr M,  
259 Leithner A, Sadoghi P. 2014. Prosthetic joint infection following total hip replacement:  
260 results of one-stage versus two-stage exchange. *Int Orthop* 38:1363–1368.
- 261 15. Siljander MP, Sobh AH, Baker KC, Baker EA, Kaplan LM. 2018. Multidrug-resistant  
262 organisms in the setting of periprosthetic joint infection - diagnosis, prevention, and  
263 treatment. *J Arthroplasty* 33:185–194.
- 264 16. Ravi S, Zhu M, Luey C, Young SW. 2016. Antibiotic resistance in early periprosthetic  
265 joint infection. *Orthop Surg* 86:1014–1018.
- 266 17. Parvizi J, Alijanipour P, Barberi EF, Hickok NJ, Phillips SK, Shapiro IM, Schwarz EM,  
267 Stevens MH, Wang Y, Shirliff ME. 2015. Novel developments in the prevention,  
268 diagnosis, and treatment of periprosthetic joint infections. *J Am Acad Orthop Surg* 23:32–  
269 43.
- 270 18. Kirby A, Graham R, Williams NJ, Wootton M, Broughton CM, Alanazi M, Anson J, Neal

- 271 TJ, Parry CM. 2010. Staphylococcus aureus with reduced glycopeptide susceptibility in  
272 Liverpool, UK. *J Antimicrob Chemother* 65:721–724.
- 273 19. Gu H, Ho PL, Tong E, Wang L, Xu B. 2003. Presenting vancomycin on nanoparticles to  
274 enhance antimicrobial activities. *Nano Lett* 3:1261–1263.
- 275 20. Zakeri-milani P, Loveymi BD, Jelvehgari M, Valizadeh H. 2013. The characteristics and  
276 improved intestinal permeability of vancomycin PLGA-nanoparticles as colloidal drug  
277 delivery system. *Colloids Surfaces B Biointerfaces* 103:174–181.
- 278 21. Lotfipour F, Abdollahi S, Jelvehgari M, Valizadeh H, Hassan M, Milani M. 2013. Study  
279 of antimicrobial effects of vancomycin loaded PLGA nanoparticles against *Enterococcus*  
280 clinical isolates. *Drug Res (Stuttg)* 64:348–352.
- 281 22. Song C, Guo Z, Ma Q, Chen Z, Liu Z, Jia H, Dang G. 2003. Simvastatin induces  
282 osteoblastic differentiation and inhibits adipocytic differentiation in mouse bone marrow  
283 stromal cells. *Biochem Biophys Res Commun* 308:458–462.
- 284 23. Heim M, Frank O, Kampmann G, Sochocky N, Pennimpede T, Fuchs P, Hunziker W,  
285 Weber P, Martin I, Bendik I. 2004. The Phytoestrogen Genistein Enhances Osteogenesis  
286 and Represses Adipogenic Differentiation of Human Primary Bone Marrow Stromal Cells.  
287 *Endocrinology* 145:848–859.
- 288 24. Duque G, Rivas D. 2007. Alendronate has an anabolic effect on bone through the  
289 differentiation of mesenchymal stem cells. *J Bone Miner Res* 22:1603–1611.
- 290 25. Jacobs FA, Sadie-Van Gijzen H, van de Vyver M, Ferris WF. 2016. Vanadate impedes  
291 adipogenesis in mesenchymal stem cells derived from different depots within bone. *Front*  
292 *Endocrinol (Lausanne)* 7:1–12.

- 293 26. Andrews JM. 2001. Determination of minimum inhibitory concentrations. *J Antimicrob*  
294 *Chemother* 48:5–16.
- 295 27. Prakash V, Lewis JS, Jorgensen JH. 2008. Vancomycin MICs for methicillin-resistant  
296 *Staphylococcus aureus* isolates differ based upon the susceptibility test method used.  
297 *Antimicrob Agents Chemother* 52:4528.
- 298 28. Wang G, Hindler JF, Ward KW, Bruckner DA. 2006. Increased vancomycin MICs for  
299 *Staphylococcus aureus* clinical isolates from a university hospital during a 5-year period. *J*  
300 *Clin Microbiol* 44:3883–3886.
- 301 29. Fair RJ, Tor Y. 2014. Antibiotics and bacterial resistance in the 21st century. *Perspect*  
302 *Medicin Chem* 6:25–64.

303

304

305 **FIG 1** The effect of vancomycin on the cell culture density of bmMSCs (left panel) and pfMSCs  
306 (right panel). Cells in SGM were treated for 7 days with 1 x MIC (5 µg/ml) and 4 x MIC (20  
307 µg/ml) vancomycin. Positive controls for cytotoxicity were 10 µg/ml cycloheximide together  
308 with 5 ng/ml TNFα (CxT) for bmMSCs and 1 µM dexamethasone (Dex) for pfMSCs. The cells  
309 were stained with crystal violet. The stain was then extracted and quantified  
310 spectrophotometrically at 570 nm. Values for control (SGM-treated) wells were set as 100%. The  
311 graph represents data of n = 4. A *post hoc* Dunnet test was done with SGM as control. Statistical  
312 significance (p<0.05) is indicated with \*.

313  
314 **FIG 2** The effect of vancomycin on the metabolic activity of bmMSCs (left panel, A) and  
315 pfMSCs (right panel, B). Cells in SGM were treated for 7 days with 1 x MIC (5 µg/ml) and 4 x  
316 MIC (20 µg/ml) vancomycin. Positive controls for cytotoxicity were 10 µg/ml cycloheximide  
317 and 5 ng/ml TNFα (CxT) for bmMSCs and 1 µM dexamethasone (Dex) for pfMSCs. Cell  
318 viability was measured via an MTT conversion assay and intensity of the colour product was  
319 measured at 570 nm. Values for control (SGM-treated) cells were set as 100%. The graph  
320 represents data of n = 4. A *post hoc* Dunnet test was done with SGM as control. Statistical  
321 significance (p < 0.05) is indicated with \*.

322  
323 **FIG 3** The effect of vancomycin on the osteoblastic differentiation of bmMSC (left panel, A)  
324 and pfMSC (right panel, B). Cells were treated with with 1 x MIC (5 µg/ml) and 4 x MIC (20  
325 µg/ml) vancomycin. The formation of mineralized extracellular matrix was evaluated with ARS  
326 staining after 7 days (bmMSCs) or 21 days (pfMSCs). Cells treated with control media (SGM  
327 plus 0.1%, v/v, ethanol) did not form any mineralized deposits. The graph represents n = 7. All  
328 data were compared to OM, which was set as 100%. Statistical significance is indicated with an  
329 \*.

330





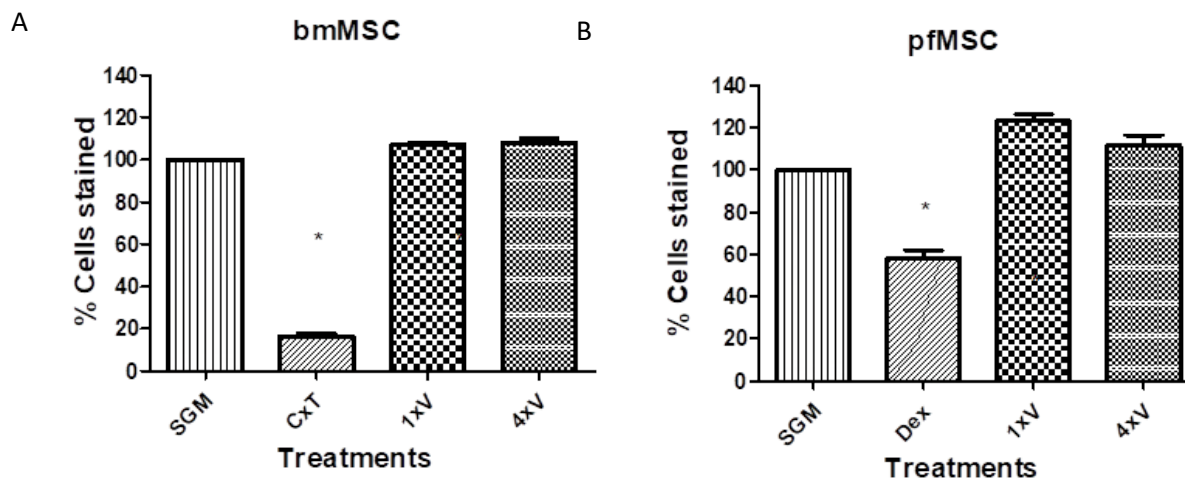

**FIG 1** The effect of vancomycin on the cell culture density of bmMSCs (left panel) and pfMSCs (right panel). Cells in SGM were treated for 7 days with 1 x MIC (5  $\mu$ g/ml) and 4 x MIC (20  $\mu$ g/ml) vancomycin. Positive controls for cytotoxicity were 10  $\mu$ g/ml cycloheximide together with 5 ng/ml TNF $\alpha$  (CxT) for bmMSCs and 1  $\mu$ M dexamethasone (Dex) for pfMSCs. The cells were stained with crystal violet. The stain was then extracted and quantified spectrophotometrically at 570 nm. Values for control (SGM-treated) wells were set as 100%. The graph represents data of n = 4. A *post hoc* Dunnett test was done with SGM as control. Statistical significance (p<0.05) is indicated with \*.

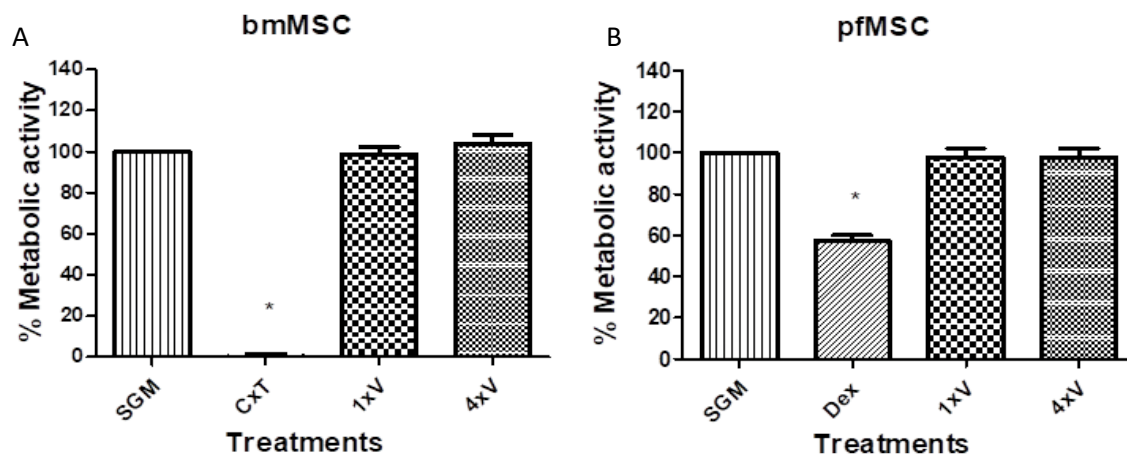

**FIG 2** The effect of vancomycin on the metabolic activity of bmMSCs (left panel, A) and pfMSCs (right panel, B). Cells in SGM were treated for 7 days with 1 x MIC (5  $\mu$ g/ml) and 4 x MIC (20  $\mu$ g/ml) vancomycin. Positive controls for cytotoxicity were 10  $\mu$ g/ml cycloheximide and 5 ng/ml TNF $\alpha$  (CxT) for bmMSCs and 1  $\mu$ M dexamethasone (Dex) for pfMSCs. Cell viability was measured via an MTT conversion assay and intensity of the colour product was measured at 570 nm. Values for control (SGM-treated) cells were set as 100%. The graph represents data of n = 4. A *post hoc* Dunnet test was done with SGM as control. Statistical significance ( $p < 0.05$ ) is indicated with \*.

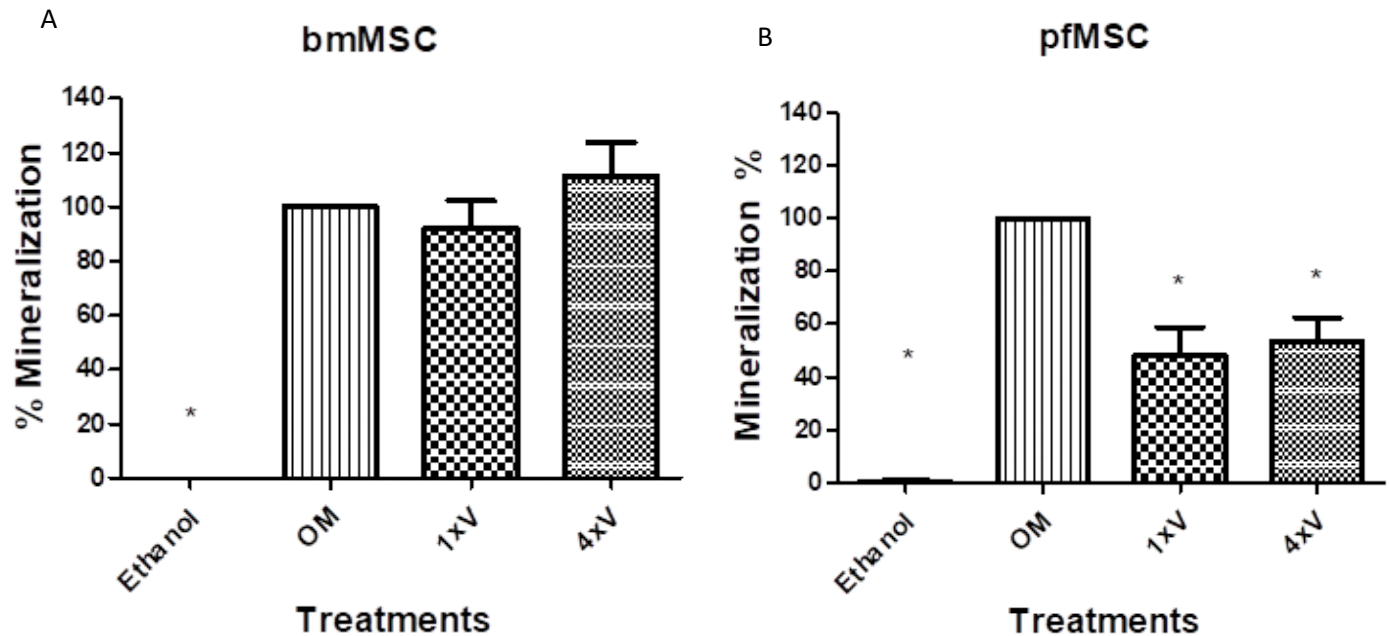

**FIG 3** The effect of vancomycin on the osteoblastic differentiation of bmMSC (left panel, A) and pfMSC (right panel, B). Cells were treated with with 1 x MIC (5  $\mu$ g/ml) and 4 x MIC (20  $\mu$ g/ml) vancomycin. The formation of mineralized extracellular matrix was evaluated with ARS staining after 7 days (bmMSCs) or 21 days (pfMSCs). Cells treated with control media (SGM plus 0.1%, v/v, ethanol) did not form any mineralized deposits. The graph represents n = 7. All data were compared to OM, which was set as 100%. Statistical significance is indicated with an \*.
